# Supplementary material for: Preparation of a MoS2/carbon nanotube composite as an electrode material for high-performance supercapacitors
Source: Royal Society of Chemistry journal article supplement (doi:10.1039/c8ra05158e), 2018-01-01
Supplement: c8ra05158e1.pdf [file c8ra05158e1.pdf]

# Supporting Information

## **Preparation of MoS<sub>2</sub>/carbon allotrope composite as electrode material for high-performance supercapacitors**

Xiaobo Chen <sup>1,\*</sup>, Jingguo Ding <sup>1</sup>, Jing Jiang <sup>1</sup>, Guoce Zhuang <sup>1</sup>, Zhihai Zhang <sup>1</sup>, Peizhi Yang <sup>2,\*</sup>

<sup>1</sup> School of New Energy and Electronic Engineering, Yancheng Teachers University, Yancheng, 224051, PR China

<sup>2</sup> Key Laboratory of Education Ministry for Advance Technique and Preparation of Renewable Energy Materials, Institute of Solar Energy, Yunnan Normal University, Kunming, 650500, PR China

E-mail addresses: chenxbok@126.com (X. Chen); pzhyang@hotmail.com (P. Yang)

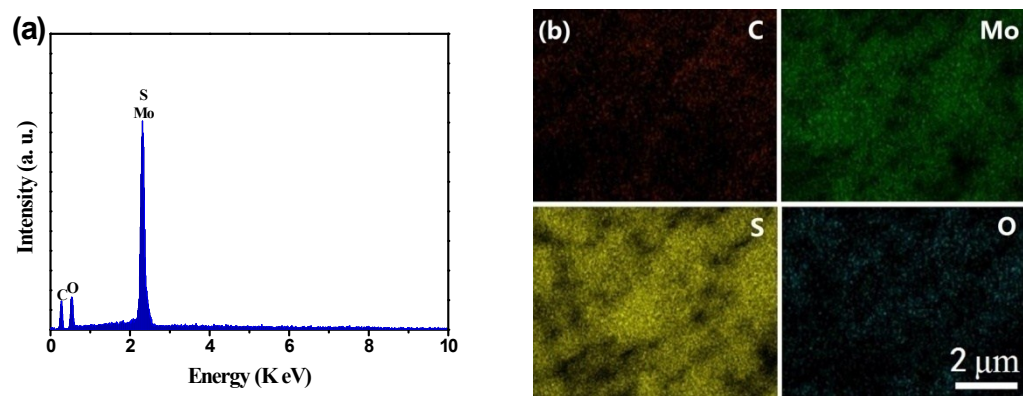

**Fig. S1** EDS pattern (a) and elemental mapping (b) of MoS<sub>2</sub>-CNT.

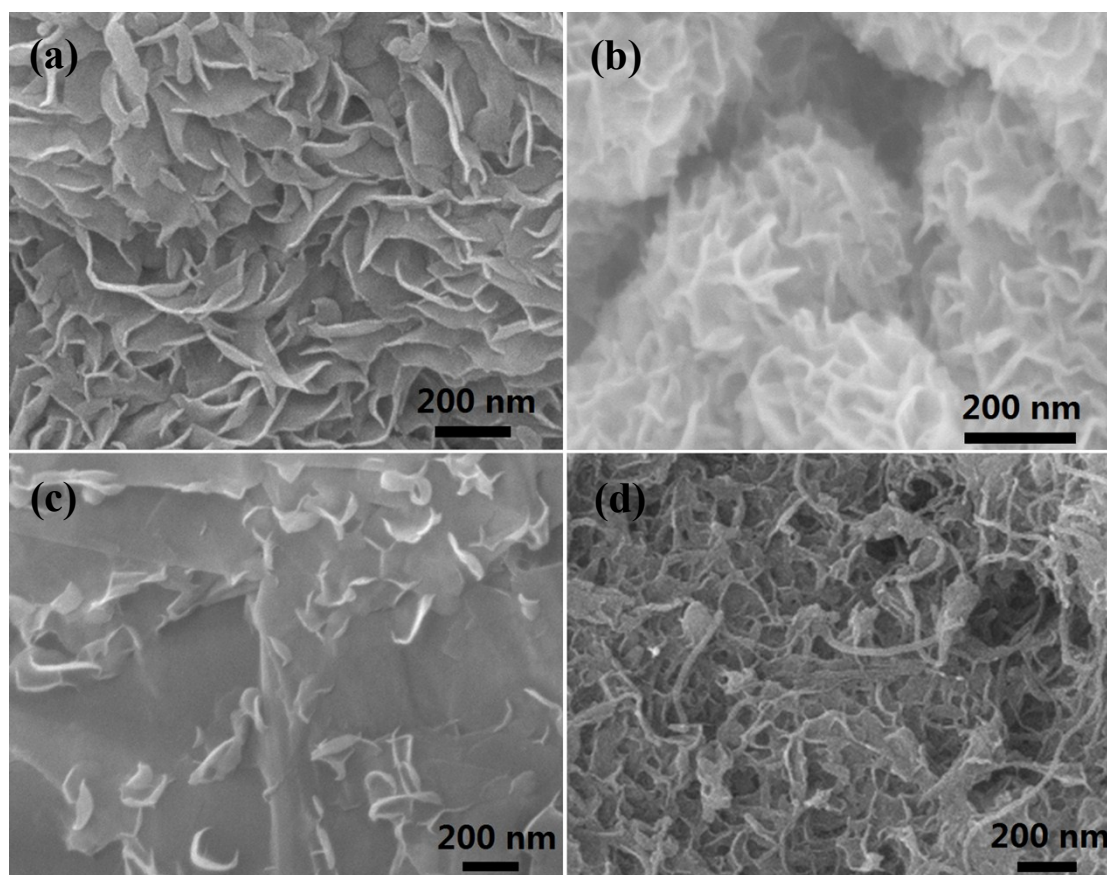

**Fig. S2** FESEM images of (a)  $\text{MoS}_2$ , (b)  $\text{MoS}_2/\text{NC}$ , (c)  $\text{MoS}_2/\text{G}$  and (d)  $\text{MoS}_2/\text{CNT}$  composites.

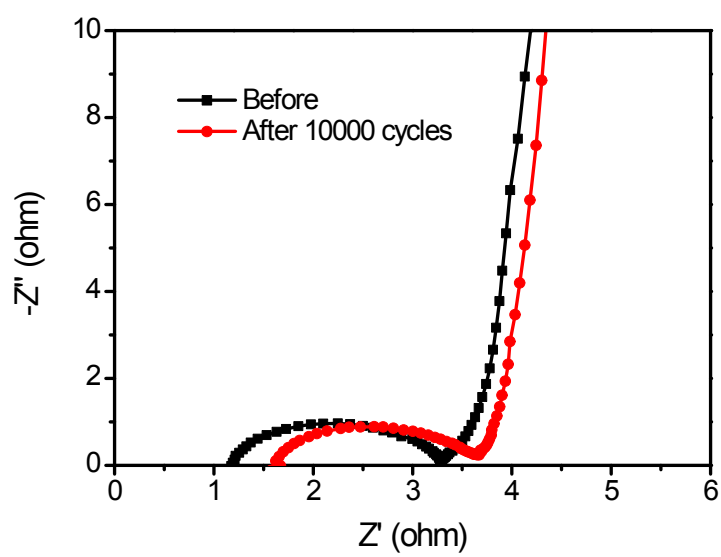

**Fig. S3** Nyquist plot of 3D MoS<sub>2</sub>/CMG before and after the 10000 cycles cycling.

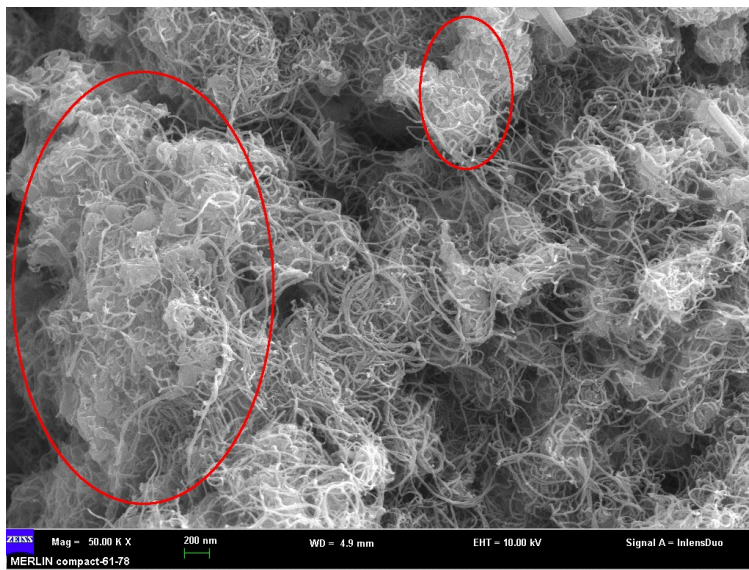

**Fig. S4** SEM image of 3D MoS<sub>2</sub>/CMG after the 10000 cycles cycling.
